# Supplementary material for: Durability studies of underwater superoleophobic graphene oxide coated wire mesh
Source: Royal Society of Chemistry journal article supplement (doi:10.1039/d2na00667g), 2023-01-01
Supplement: d2na00667g1.pdf [file d2na00667g1.pdf]

## Supplementary Information

### Durability Studies of Underwater Superoleophobic Graphene Oxide Coated Wire Mesh

Pichkari Saikiran, Mayuri Dhole and Nandini Bhandaru\*

Department of Chemical Engineering, Birla Institute of Technology and Science Pilani,  
Hyderabad Campus, Pin - 500 078, Telangana, India

Corresponding author: nandini@hyderabad.bits-pilani.ac.in

Typically, the liquid CA and wettability on a solid surface in the air are determined by using Young's equation. Young's equation can be modified for different settings, including the determination of CA of a liquid on a solid surface immersed in a second liquid. The modified equation can be written as:

$$\cos \theta_3 = \frac{\gamma_{o-a} \cos \theta_1 - \gamma_{w-a} \cos \theta_2}{\gamma_{o-w}} \quad (1)$$

where  $\gamma_{o-a}$  is the oil-air interface tension,  $\theta_1$  is the CA of oil in the air,  $\gamma_{w-a}$  is the water-air interface tension,  $\theta_2$  is the CA of water in the air,  $\gamma_{o-w}$  is oil-water interface tension, and  $\theta_3$  is the CA of oil in water.

Table S1 lists the CA of different oils/non-polar liquids on GO-coated glass slide, bare mesh, GO-coated mesh, and GO\*-coated mesh. Based on the  $\gamma_{w-a}$ ,  $\gamma_{o-a}$ , and  $\gamma_{o-w}$  for Edible oil, toluene, and kerosene, we calculated the values of  $\theta_3$  using equation 1 (values mentioned in Table S1). As equation 1 based on Young's equation is for solid substrates, for GO-coated glass slide, we observed that equation 1 predicts the underwater CA for all oils/non-polar liquids,  $\theta_3 > 100^\circ$ . This shows that GO-coated surfaces show oleophobic nature underwater. In case of bare mesh, GO-coated mesh and GO\*-coated mesh, due to porosity, the liquid drops permeate through the mesh over different periods of time depending on wettability. As  $\theta_2$  varies due to porosity, the

use of equation 1 will not give accurate values. We still have used the initial CA values to predict  $\theta_3$  values on meshes, as mentioned in Table 1, using equation 1. The calculated values of  $\theta_3$  show that with a decrease in the value of  $\theta_2$ , the value of  $\theta_3$  increases. Thus, a more hydrophilic surface in the air will show better oleophobicity underwater.

Table S1: CA in air for different test liquids on GO coated surfaces/meshes.

| Test Liquid                                                                             | GO- Coated glass slide                                                                                                                                   | Bare mesh                                                                                                                                                             | GO-coated mesh                                                                                                                                                         | GO*-coated mesh                                                                                                                                                          |
|-----------------------------------------------------------------------------------------|----------------------------------------------------------------------------------------------------------------------------------------------------------|-----------------------------------------------------------------------------------------------------------------------------------------------------------------------|------------------------------------------------------------------------------------------------------------------------------------------------------------------------|--------------------------------------------------------------------------------------------------------------------------------------------------------------------------|
| Water<br>$\gamma_{w-a} = 72.8 \text{ mN/m}$                                             | <br>$\theta_2 = 59.8^\circ \pm 3^\circ$                                 | <br>$\theta_2 = 92.7^\circ \pm 1.6^\circ$                                            | <br>$\theta_2 = 81.3^\circ \pm 2.2^\circ$<br>(initial CA)                            | <br>$\theta_2 = 74.3^\circ \pm 2^\circ$<br>(initial CA)                               |
| Edible oil<br>$\gamma_{o-a} = 31.5 \text{ mN/m}$<br>$\gamma_{o-w} = 37.04 \text{ mN/m}$ | <br>$\theta_1 = 31.9^\circ \pm 0.1^\circ$<br>$\theta_3 = 105.5^\circ$  | <br>$\theta_1 = 21.8^\circ \pm 0.2^\circ$<br>(initial CA)<br>$\theta_3 = 28.1^\circ$ | <br>$\theta_1 = 60.9^\circ \pm 1.9^\circ$<br>(initial CA)<br>$\theta_3 = 83.3^\circ$ | <br>$\theta_1 = 74.5^\circ \pm 0.5^\circ$<br>(initial CA)<br>$\theta_3 = 107.7^\circ$ |
| Toluene<br>$\gamma_{o-a} = 28.4 \text{ mN/m}$<br>$\gamma_{o-w} = 36.1 \text{ mN/m}$     | <br>$\theta_1 = 10.5^\circ \pm 0.6^\circ$<br>$\theta_3 = 103.9^\circ$ | <br>$\theta_1 = 0^\circ$ (immediate spreading)<br>$\theta_3 = 28.1^\circ$          | <br>$\theta_1 = 0^\circ$ (immediate spreading)<br>$\theta_3 = 61.2^\circ$          | <br>$\theta_1 = 0^\circ$ (immediate spreading)<br>$\theta_3 = 76.1^\circ$           |
| Kerosene<br>$\gamma_{o-a} = 28.3 \text{ mN/m}$<br>$\gamma_{o-w} = 39.9 \text{ mN/m}$    | <br>$\theta_1 = 13.5^\circ \pm 0.1^\circ$<br>$\theta_3 = 103.2^\circ$ | <br>$\theta_1 = 0^\circ$ (immediate spreading)<br>$\theta_3 = 37.3^\circ$          | <br>$\theta_1 = 0^\circ$ (immediate spreading)<br>$\theta_3 = 64.3^\circ$          | <br>$\theta_1 = 0^\circ$ (immediate spreading)<br>$\theta_3 = 77.6^\circ$           |
